# Supplementary material
Source: MDPI journal article supplement (https://www.mdpi.com/2072-4292/13/19/4010)
Supplement: s1 [file s1]

**Table S1.** Pearson correlation coefficients between SM-GPP, LST-GPP and SM\_LST anomalies during spring and summer for each land cover-type in 2005 and 2012 over IB. All correlation values are statistically significant at 1% level, with exception for the underline italic values. HTC corresponds to High Tree Cover areas, LTC represents Low Tree Cover Areas and Cp characterizes croplands.

|             |        | SM-GPP     |             |             | LST-GPP    |            |           | SM-LST     |            |           |
|-------------|--------|------------|-------------|-------------|------------|------------|-----------|------------|------------|-----------|
|             |        | <i>HTC</i> | <i>LTC</i>  | <i>Cp</i>   | <i>HTC</i> | <i>LTC</i> | <i>Cp</i> | <i>HTC</i> | <i>LTC</i> | <i>Cp</i> |
| <b>IB05</b> | Spring | 0.07       | 0.17        | 0.10        | -0.38      | -0.54      | -0.50     | -0.29      | -0.36      | -0.35     |
|             | Summer | 0.32       | 0.39        | 0.35        | -0.57      | -0.59      | -0.61     | -0.39      | -0.49      | -0.43     |
| <b>IB12</b> | Spring | -0.41      | -0.10       | <u>0.01</u> | 0.23       | 0.09       | -0.07     | -0.36      | -0.42      | -0.32     |
|             | Summer | -0.04      | <u>0.01</u> | 0.23        | -0.32      | -0.40      | -0.49     | -0.06      | -0.13      | -0.27     |

**Table S2.** See Table S1 for similar explanation, but over EM in 2003 and 2007.

|             |        | SM-GPP     |            |           | LST-GPP    |            |           | SM-LST     |            |           |
|-------------|--------|------------|------------|-----------|------------|------------|-----------|------------|------------|-----------|
|             |        | <i>HTC</i> | <i>LTC</i> | <i>Cp</i> | <i>HTC</i> | <i>LTC</i> | <i>Cp</i> | <i>HTC</i> | <i>LTC</i> | <i>Cp</i> |
| <b>EM03</b> | Spring | 0.05       | -0.01      | 0.16      | 0.25       | 0.11       | -0.06     | -0.05      | -0.09      | -0.08     |
|             | Summer | 0.16       | 0.10       | 0.09      | -0.38      | -0.54      | -0.65     | -0.16      | -0.18      | -0.29     |
| <b>EM07</b> | Spring | -0.14      | -0.12      | 0.06      | 0.35       | 0.31       | 0.11      | -0.06      | -0.10      | -0.25     |
|             | Summer | 0.36       | 0.25       | 0.37      | -0.50      | -0.41      | -0.57     | -0.48      | -0.30      | -0.50     |

**Table S3.** See Table S1 for similar explanation, but over WE in 2003 and 2006.

|             |        | SM-GPP     |            |              | LST-GPP    |            |              | SM-LST     |            |           |
|-------------|--------|------------|------------|--------------|------------|------------|--------------|------------|------------|-----------|
|             |        | <i>HTC</i> | <i>LTC</i> | <i>Cp</i>    | <i>HTC</i> | <i>LTC</i> | <i>Cp</i>    | <i>HTC</i> | <i>LTC</i> | <i>Cp</i> |
| <b>WE03</b> | Spring | -0.05      | 0.08       | <u>0.00</u>  | -0.06      | 0.06       | <u>-0.00</u> | -0.21      | -0.13      | -0.17     |
|             | Summer | -0.23      | -0.12      | <u>-0.01</u> | -0.37      | -0.58      | -0.55        | 0.11       | -0.23      | -0.32     |
| <b>WE06</b> | Spring | 0.11       | 0.22       | 0.16         | 0.18       | 0.29       | 0.25         | 0.19       | 0.15       | 0.09      |
|             | Summer | 0.15       | 0.11       | 0.17         | -0.20      | -0.14      | -0.03        | -0.63      | -0.54      | -0.49     |
